# Supplementary material
Source: Springer Nature journal article supplement (https://www.springermedizin.de/resource/supplementary/12885_2013_4699_MOESM9_ESM.pdf/9467030)

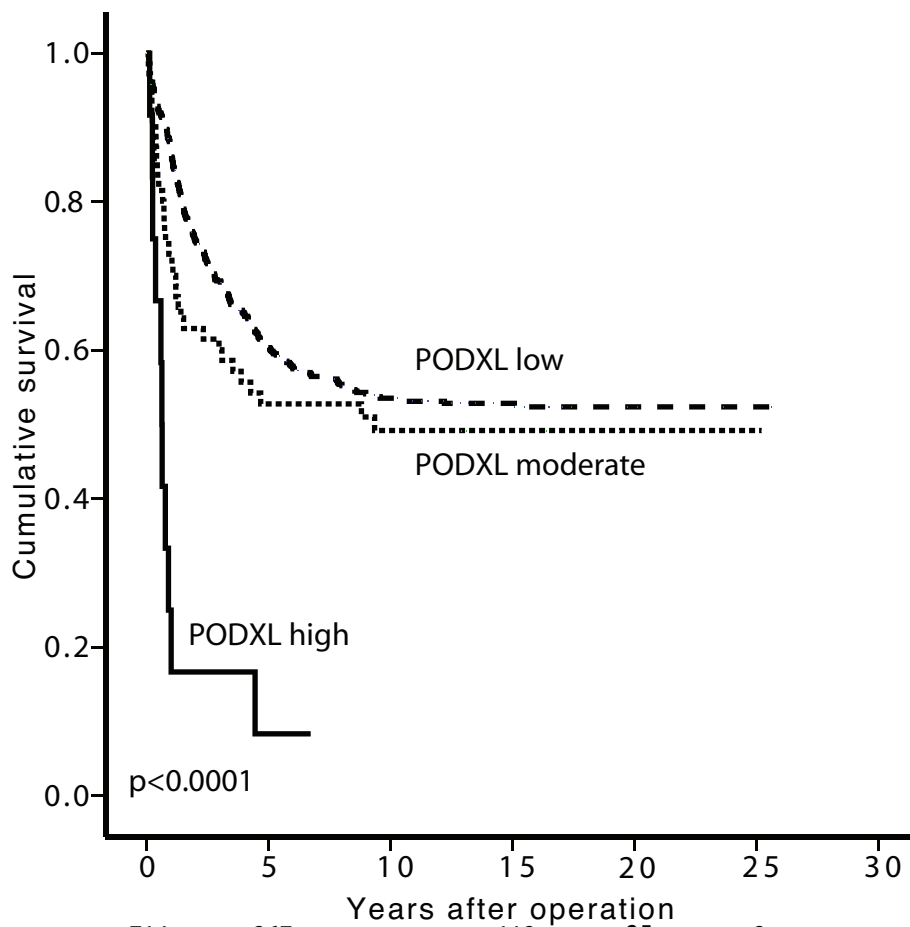

**Patients at risk**

|          | 0   | 5   | 10  | 15  | 20 | 25 |
|----------|-----|-----|-----|-----|----|----|
| Low      | 714 | 367 | 267 | 112 | 35 | 3  |
| Moderate | 79  | 36  | 26  | 13  | 5  | 1  |
| High     | 14  | 1   | 0   | 0   | 0  | 0  |

Supplement: MOESM9 [file 9467030]
